# Supplementary material for: 19q13 KRAB zinc-finger protein ZNF471 activates MAPK10/JNK3 signaling but is frequently silenced by promoter CpG methylation in esophageal cancer
Source: PubMed Central journal article supplement (PMC7019175; doi:10.7150/thno.35861), 2020-01-12

**Suppl. Table 1.** Association between *ZNF471* methylation and clinicopathological parameters of ESCC patients.

| Clinicopathological features | Numbers (N=79) | ZNF471 methylation status |              | p value |
|------------------------------|----------------|---------------------------|--------------|---------|
|                              |                | Methylated                | Unmethylated |         |
| <b>Age</b>                   |                |                           |              | 0.779   |
| <63                          | 46             | 25                        | 21           |         |
| ≥63                          | 33             | 19                        | 14           |         |
| <b>Gender</b>                |                |                           |              | 0.613   |
| Male                         | 63             | 36                        | 27           |         |
| Female                       | 16             | 8                         | 8            |         |
| <b>Tumor Location</b>        |                |                           |              | 0.970   |
| Upper                        | 16             | 11                        | 5            |         |
| Middle                       | 46             | 20                        | 26           |         |
| Lower                        | 16             | 12                        | 4            |         |
| Unknown                      | 1              | 1                         | 0            |         |
| <b>Differentiation</b>       |                |                           |              | 0.649   |
| Moderately/Well              | 72             | 40                        | 32           |         |
| Poorly                       | 7              | 4                         | 3            |         |
| <b>Tumor Grade</b>           |                |                           |              | 0.457   |
| T1–2                         | 28             | 14                        | 14           |         |
| T3–4                         | 51             | 30                        | 21           |         |
| <b>Tumor Size</b>            |                |                           |              | 0.571   |
| >5.0 cm                      | 6              | 2                         | 4            |         |
| ≥2.0 cm ≤5.0 cm              | 64             | 37                        | 27           |         |
| <2.0 cm                      | 4              | 2                         | 2            |         |
| Unknown                      | 5              | 3                         | 2            |         |
| <b>Tumor Stage</b>           |                |                           |              | 0.971   |
| I/II                         | 54             | 30                        | 24           |         |
| III/IV                       | 25             | 14                        | 11           |         |
| <b>Lymph Nodes</b>           |                |                           |              |         |
| <b>Metastasis</b>            |                |                           |              | 0.710   |
| Positive                     | 22             | 13                        | 9            |         |
| Negative                     | 57             | 31                        | 26           |         |
| <b>Distant Metastasis</b>    |                |                           |              | 0.376   |
| Positive                     | 1              | 1                         | 0            |         |
| Negative                     | 78             | 43                        | 35           |         |

$\chi^2$  and Fisher exact tests were used.

**Suppl. Table 2.** Primers used in this study

| PCR     | Primer                | Sequence (5'-3')       | Product size (bp) | PCR cycles | Annealing temp. (°C) |
|---------|-----------------------|------------------------|-------------------|------------|----------------------|
| RT-PCR  | ZNF471F               | GAGATGACGAGTGAGATGAC   | 194bp             | 32         | 55                   |
|         | ZNF471R               | TGACTTCCCATCTGCTTCTC   |                   |            |                      |
| qRT-PCR | GAPDHF                | CCAGCAAGAGCACAAAGAGGAA | 114bp             | 23         | 55                   |
|         | GAPDHR                | GGTCTACATGGCAACTCAAGG  |                   |            |                      |
|         | MAPK10F               | CATCCCTACATCAACGTCTG   | 249bp             |            | 60                   |
|         | MAPK10R               | GGAGGAGATGTCATTGACAG   |                   |            |                      |
|         | SAMD9LF               | GCTAGAAGCTCTGAGAGCAGA  | 116bp             |            | 60                   |
|         | SAMD9LR               | TGCTGCAGTAGGAAGGCATA   |                   |            |                      |
|         | TUSC3F                | GTATGGTGGACTATGATGAGGG | 120bp             |            | 60                   |
|         | TUSC3R                | TGGAGGTCAAAAGTATCAGCTC |                   |            |                      |
|         | IFNL3F                | GCTGCCACATAGCCCAGTTC   | 157bp             |            | 60                   |
|         | IFNL3R                | CTCACCTGCAGCTGCCTCA    |                   |            |                      |
|         | PNMTF                 | CTCATCGACATTGGTTCAGGC  | 175bp             |            | 60                   |
|         | PNMTR                 | TGAGGCAGGCATGTTGGCTG   |                   |            |                      |
|         | PYCARDF               | CAAGCTGAAGCTGCTGTCTG   | 162bp             |            | 60                   |
|         | PYCARDR               | CCATGTGCGCGCAGCACGT    |                   |            |                      |
|         | FOSBF                 | GGCGACCCCTTCCCCGTTGT   | 102bp             |            | 60                   |
|         | FOSBR                 | ACTGCCGCTGGTGCCTTGG    |                   |            |                      |
|         | IL1BF                 | GCCTGAAGCCCTTGCTGTAGT  | 51bp              |            | 60                   |
|         | IL1BR                 | GCGGCATCCAGCTACGAAT    |                   |            |                      |
|         | CNTN1F                | GTTGCTGGTCAGTCATCTTGTG | 140bp             |            | 60                   |
|         | CNTN1R                | TGGTATTGATTGGCTGCTCTTC |                   |            |                      |
|         | CDH12F                | AGCAGACTTTAGCCACAGAGC  | 182bp             |            | 60                   |
|         | CDH12R                | AGTGCCCTCTCCCTTGCTA    |                   |            |                      |
|         | CDH19F                | GTCAAGCAGCCAGTGCGATCT  | 169bp             |            | 60                   |
|         | CDH19R                | CAGCTCCAGCTCCAAAAGC    |                   |            |                      |
|         | PCDH8F                | CGACAGCGATTCCGACATCA   | 273bp             |            | 60                   |
|         | PCDH8R                | CTCTGCAGCCCCACTGTCTT   |                   |            |                      |
|         | PCDH9F                | CTGTTGGCTGCTCTGATTGC   | 148bp             |            | 60                   |
|         | PCDH9R                | CTGTGGCAGCATTGATGTGAG  |                   |            |                      |
| PCDH10F | ACTGCTATCAGGTATGCCTG  | 219bp                  |                   | 60         |                      |
| PCDH10R | GTCTGTCAACTAGATAGCTG  |                        |                   |            |                      |
| PCDH17F | TGGAGGAGAGGAACGCCATG  | 299bp                  |                   | 60         |                      |
| PCDH17R | AACAACTGCTGCCTGCTGC   |                        |                   |            |                      |
| PCDH18F | CACGATGTAAGTGGCAAGAAT | 138bp                  |                   | 60         |                      |
| PCDH18R | GGCTCGAAATCGAACAGTAG  |                        |                   |            |                      |

|                                     |             |                                           |       |    |
|-------------------------------------|-------------|-------------------------------------------|-------|----|
|                                     | PCDHA1F     | CTCCAAGTCTTAACACGTCAGA                    | 124bp | 60 |
|                                     | PCDHA1R     | CTGTGCATGCCTGCTCTCAG                      |       |    |
|                                     | PCDHB15F    | GACCGTCTGTTAATTTTGTCTTCC                  | 129bp | 60 |
|                                     | PCDHB15R    | CAGACAAAGGAAATGAGTAACAT                   |       |    |
|                                     | PCDHB6F     | AGCCATTCACTTATGCATATTT                    | 124bp | 60 |
|                                     | PCDHB6R     | GCTCACAAACTAATGTGTTGACA                   |       |    |
|                                     | PCDHB8F     | GGAGCCTGTCTCAGAACTATCAGT                  | 124bp | 60 |
|                                     | PCDHB8R     | ACTGGTTTCAGGAACTGGAECTCA                  |       |    |
|                                     | PCDHB12F    | GGGAGAACCTAGAAGCCATTCAAC                  | 124bp | 60 |
|                                     | PCDHB12R    | CGCAGTTGTGGGAAACGT                        |       |    |
|                                     | PCDHB14F    | GGACATTTTGGAGAGAACTG                      | 124bp | 60 |
|                                     | PCDHB14R    | GTAAGGCCTTCTAAAAGATAATTG                  |       |    |
|                                     | PCDHGA5F    | GCGAGCCTCTTCTGATGTCTGATA                  | 124bp | 60 |
|                                     | PCDHGA5R    | GAGAAACGCCAGTCCGTGTTG                     |       |    |
|                                     | PCDHGA7F    | TGCTAACATCCGTAGATTTTCAGG                  | 124bp | 60 |
|                                     | PCDHGA7R    | GAGAAACGCCAGTCCGTGTTG                     |       |    |
| <b>MSP</b>                          | ZNF471m44   | TTTTGTTTTCGTTTTTTTCGTTC                   | 223bp | 60 |
|                                     | ZNF471m6    | ACGCGACTAAACCTTCGCG                       |       |    |
|                                     | ZNF471u44   | GTTTTGTTTTGTTTTTTTGTTC                    | 228bp | 58 |
|                                     | ZNF471u6    | AAAAACACAACCTAACCTTCACA                   |       |    |
| <b>ChIP assay</b>                   | MAPK10proF1 | GAGAAGAGGAGCAGCATCTC                      | 127bp |    |
|                                     | MAPK10proR1 | AGGCGTCGAGCACAGTAGGG                      |       |    |
|                                     | MAPK10proF2 | CCCTACTGTGCTCGACGCCT                      | 164bp |    |
|                                     | MAPK10proR2 | GTGACACACCATGCTCACG                       |       |    |
|                                     | MAPK10proF3 | CGTGAGCATGGTGTGTAC                        | 158bp |    |
|                                     | MAPK10proR3 | AGCTCGGGTGGGAGATCT                        |       |    |
|                                     | MAPK10proF4 | AGATCTCCCACCCCGAGCT                       | 180bp |    |
|                                     | MAPK10proR4 | CGCTCGGTCACCAACCTGA                       |       |    |
| <b>Dual-luciferase report assay</b> | MAPK10procF | CTAGCCCGGGCTCGAGCGAAAGC<br>AGAGAGAGGAGGAA | 860bp |    |
|                                     | MAPK10procR | CCGGAATGCCAAGCTTCAGGCGCT<br>AGGAACTCTGC   |       |    |

## **Supplementary Figure legends**

**Supplementary Fig 1.** Correlation analysis of expression and promoter methylation status of ZNF471 in ESCC tissue samples from The Cancer Genome Atlas (TCGA).

**Supplementary Fig 2.** Cell migration abilities of ESCC cells, evaluated by wound healing assays. Photographs were captured at 0, 12 and 24 h. Representative wound healing ratio is shown. Scale bars: 200  $\mu\text{m}$ .

**Supplementary Fig 3.** Expression and location of E-cadherin and Vimentin markers in ESCC cells, as detected by confocal microscopy. Scale bars: 10  $\mu\text{m}$ .

**Supplementary Fig 4.** (A, B) MAPK10 expression level in ZNF471-stably transfected KYSE410 cells, shown by visualization graphs and histogram (C) KEGG pathway categories of differentially expressed genes. The rich factor represents the proportion of differentially expressed genes within a specific term, and the size of the point represents the number of related differentially expressed genes. The q-value is the calibrated p value.

**Supplementary Fig 5.** Correlation analysis of expression of ZNF471 and MAPK10 in ESCC tissue samples from The Cancer Genome Atlas (TCGA).

**Supplementary Fig 6.** % input of MAPK10 DNA by anti-histone H4 acetylcholine antibody and anti-histone H2A phosphorylation were determined by ChIP-qPCR.

**Supplementary Fig 7.** The effect of ZNF471 on MAPK10/JNK3 signaling, as determined by luciferase reporter activity assays in 293T cells. The pLG3-Tr1 plasmid corresponds to all ChIP primer regions, the pLG3-Tr2 truncated plasmid corresponds to the ChIP primer F1/R1 and F2/R2 regions, the pLG3-Tr3 truncated plasmid corresponds to the ChIP primer F3/R3 region, and the pLG3-Tr4 truncated plasmid corresponds to the ChIP primer F4/R4

region.  
sFig 1.

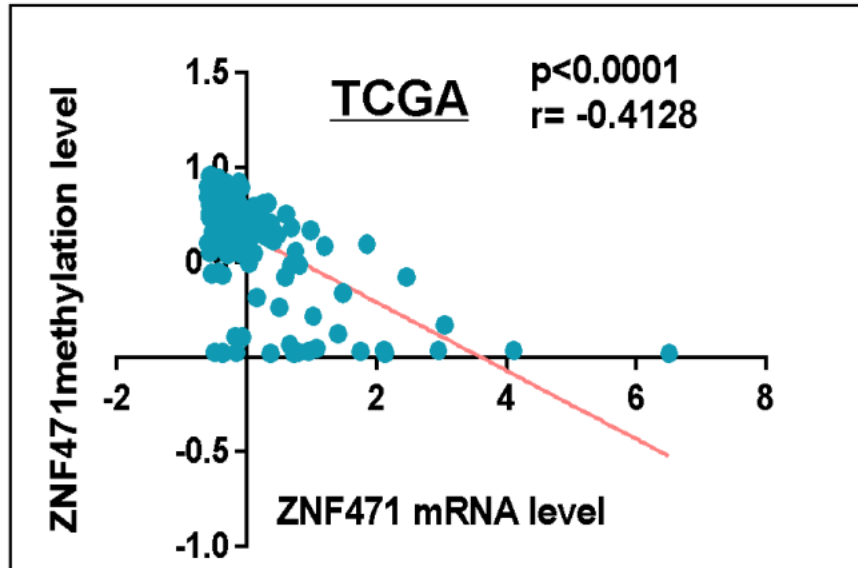

sFig 2.

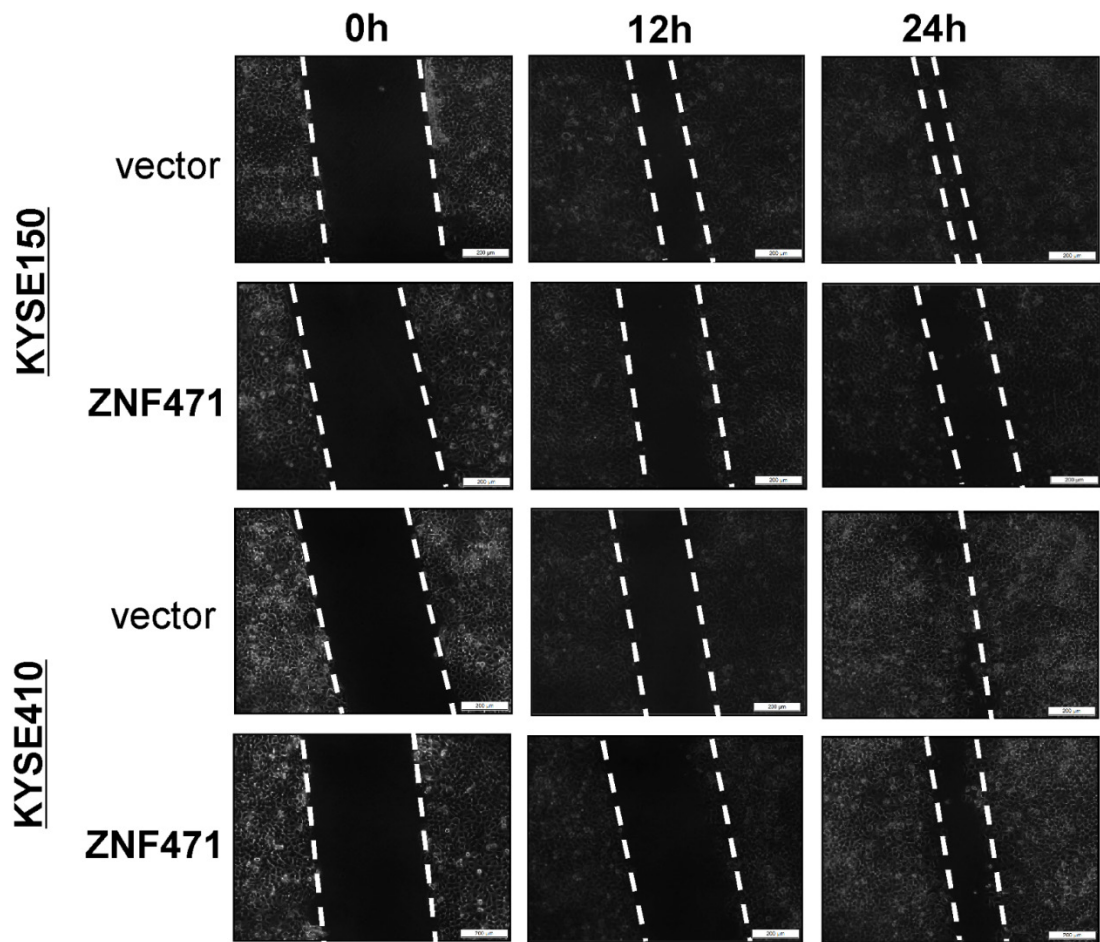

sFig 3.

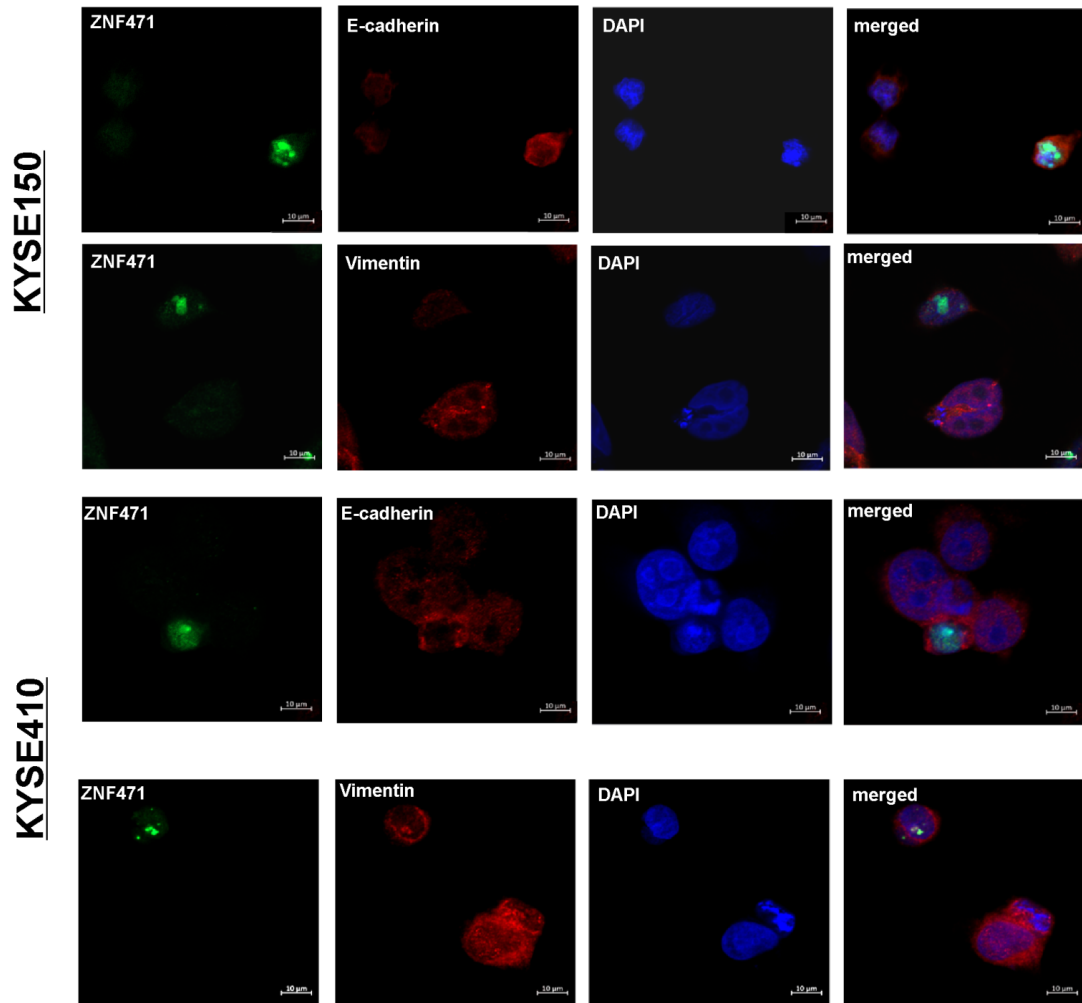

sFig 4.

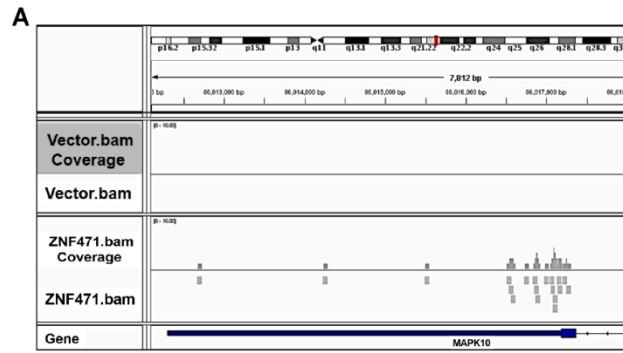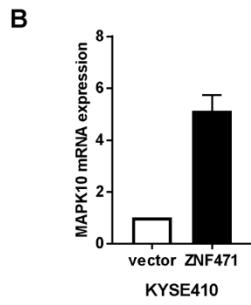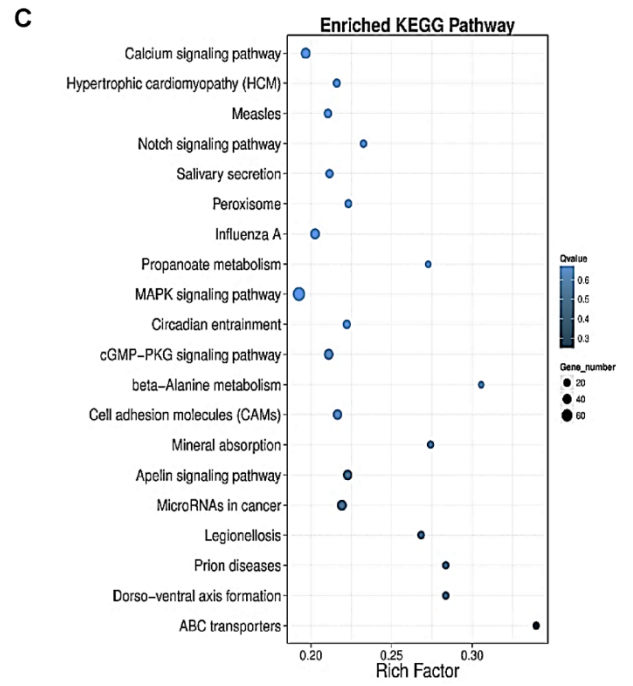



sFig 5.

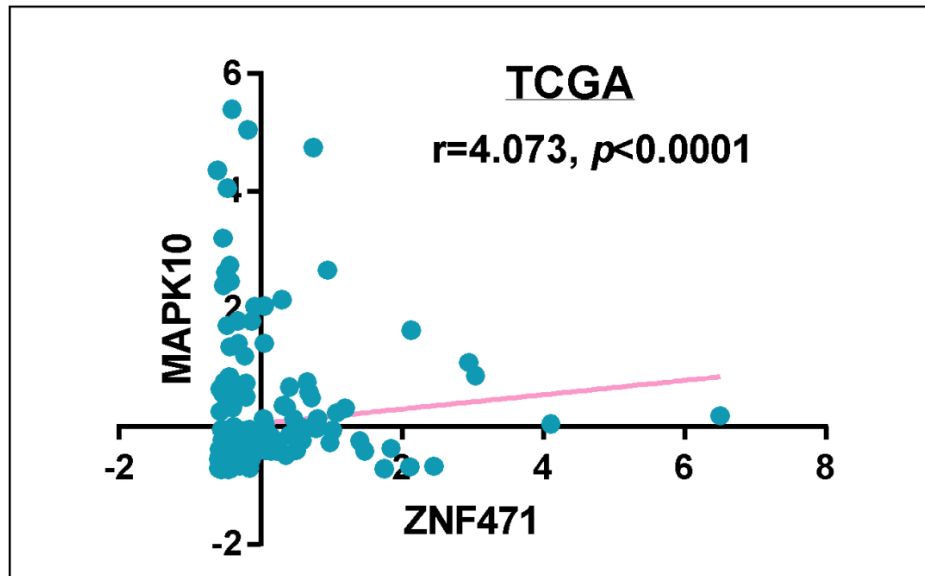

sFig 6.

**MAPK10  
proF2/R2**

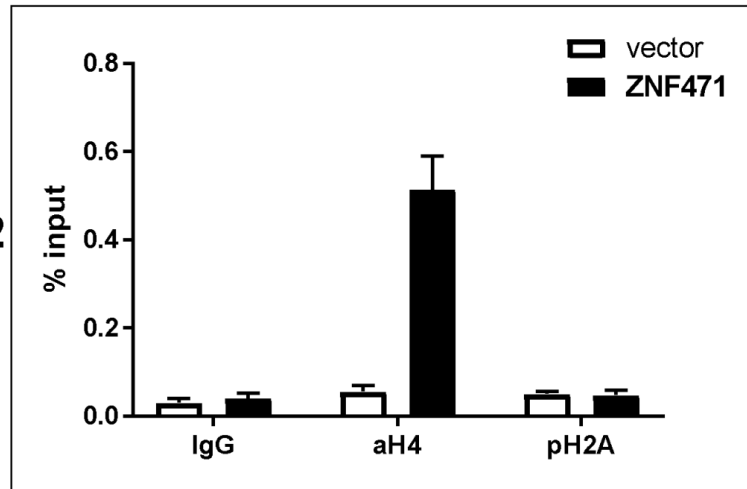

**MAPK10  
proF3/R3**

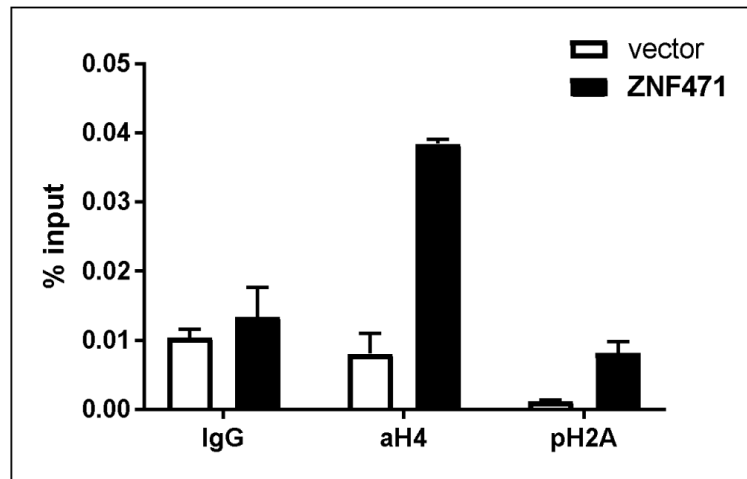

sFig 7.

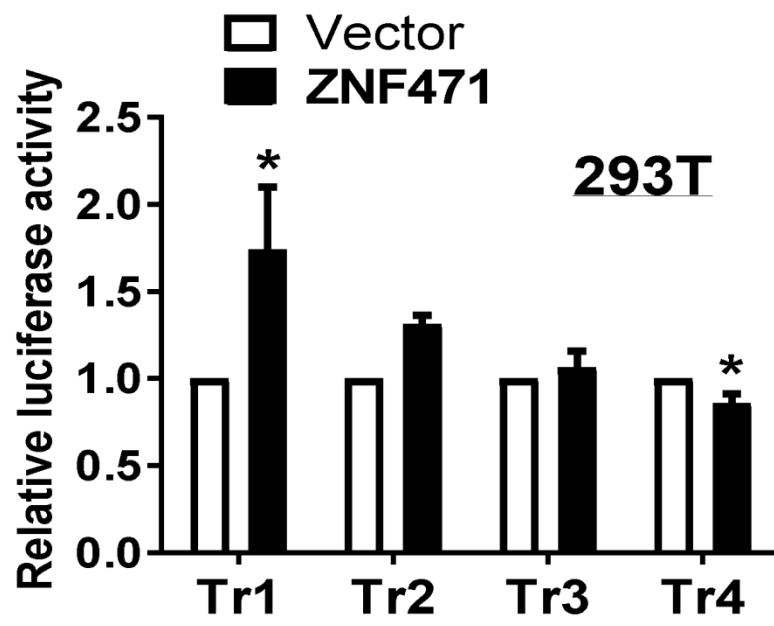

Supplement: thnov10p2243s1.pdf [file thnov10p2243s1.pdf]
